# Supplementary material
Source: PubMed Central journal article supplement (PMC4475414)
Supplement: NIHMS673554-supplement-01.pdf [file NIHMS673554-supplement-01.pdf]

**Supplementary Table 1:** All pre- and post-TTh laboratory values.

|                       | All Patients         | ↑Hct <10%            | ↑Hct ≥10%            | p-value | No 5αRI              | 5ARI                 | p-value |
|-----------------------|----------------------|----------------------|----------------------|---------|----------------------|----------------------|---------|
| <b>Pre-Treatment</b>  |                      |                      |                      |         |                      |                      |         |
| <b>TT (ng/dL)</b>     | 264.0 (198.0-321.0)  | 266.0 (203.0-322.0)  | 262.5 (184.3- 316.5) | 0.69    | 261.0 (191.3-320.3)  | 278.0 (237.0-322.0)  | 0.47    |
| <b>DHT (ng/dL)</b>    | 210.0 (107.2-260.5)  | 212.5 (98.6-267.8)   | 156.5 (113.3-225.3)  | 0.30    | 213.0 (128.0-273.3)  | 116.0 (43.2-201.0)   | 0.02    |
| <b>FT (pg/mL)</b>     | 5.7 (4.2-7.0)        | 5.9 (4.7-7.0)        | 5.0 (3.8-6.7)        | 0.24    | 5.6 (4.0-7.)_        | 6.0 (5.1-7.6)        |         |
| <b>LH (mIU/mL)</b>    | 3.0 (2.0-4.0)        | 3.0 (2.0-4.0)        | 3.0 (2.0-5.0)        | 0.58    | 3.0 (2.0-4.0)        | 4.0 (2.0-5.0)        | 0.22    |
| <b>FSH (mIU/mL)</b>   | 5.0 (3.0-7.0)        | 5.0 (3.0-7.0)        | 5.0 (3.0-8.0)        | 0.54    | 5.0 (3.0-7.0)        | 5.0 (4.8-7.0)        | 0.23    |
| <b>Hct (%)</b>        | 44.8 (43.0-47.0)     | 45.1 (43.6-47.0)     | 43.0 (41.0-45.2)     | <0.001  | 44.9 (43.0-47.0)     | 44.3 (42.9-45.6)     | 0.34    |
| <b>TChol (mg/dL)</b>  | 176.0 (148.0-217.0)  | 176.0 (148.0-217.0)  | 176.0 (147.5-214.0)  | 0.95    | 178.5 (148.5-219.5)  | 162.5 (138.3-209.3)  | 0.32    |
| <b>TG (mg/dL)</b>     | 139.5 (88.3-204.8)   | 128.0 (87.0-205.0)   | 149.0 (107.0-207.0)  | 0.47    | 136.5 (89.3-204.0)   | 158.5 (87.3-247.3)   | 0.73    |
| <b>HDL (mg/dL)</b>    | 45.0 (39.0-51.0)     | 44.0 (39.0-51.0)     | 47.0 (38.5-54.5)     | 0.59    | 45.0 (40.0-52.0)     | 40.0 (36.3-50.0)     | 0.12    |
| <b>LDL (mg/dL)</b>    | 101.0 (78.0-127.0)   | 101.5 (79.3-126.8)   | 95.5 (74.8-130.0)    | 0.83    | 101.5 (78.3-127.0)   | 96.5 (72.8-127.0)    | 0.59    |
| <b>Post-Treatment</b> |                      |                      |                      |         |                      |                      |         |
| <b>TT (ng/dL)</b>     | 750.0 (427.5-1258.3) | 725.0 (415.0-1210.0) | 863.0 (519.0-1292.0) | 0.28    | 743.0 (427.5-1266.0) | 785.0 (441.3-1206.5) | 0.93    |
| <b>DHT (ng/dL)</b>    | 4850 (280.0-766.0)   | 436.0 (260.0-739.0)  | 605.0 (354.5-872.0)  | 0.02    | 536.0 (339.0-809.0)  | 126.0 (69.5-253.8)   | <0.001  |
| <b>FT (pg/mL)</b>     | 16.4 (8.4-26.7)      | 15.2 (7.5-26.6)      | 18.4 (9.1-27.2)      | 0.27    | 16.4 (8.6-27.1)      | 16.1 (6.8-19.7)      |         |
| <b>LH (mIU/mL)</b>    | 0.28 (0.09-0.90)     | 0.31 (0.10-1.0)      | 0.19 (0.05-0.30)     | 0.01    | 0.2 (0.1-0.8)        | 0.3 (0.1-5.0)        | 0.35    |
| <b>FSH (mIU/mL)</b>   | 0.34 (0.1-2.0)       | 0.45 (0.11-3.0)      | 0.18 (0.06-0.64)     | 0.01    | 0.3 (0.1-1.0)        | 0.8 (0.1-6.0)        | 0.17    |
| <b>Hct (%)</b>        | 46.8 (45.1-49.4)     | 46.6 (44.8-48.3)     | 49.4 (46.4-51.6)     | <0.001  | 47.2 (45.4-49.8)     | 45.4 (43.6-46.6)     | 0.77    |
| <b>TChol (mg/dL)</b>  | 175.0 (148.0-202.8)  | 175.0 (144.3-199.5)  | 175.0 (159.3-205.5)  | 0.33    | 174.5 (148.3-202.8)  | 185.0 (144.3-205.8)  | 0.68    |
| <b>TG (mg/dL)</b>     | 131.5 (90.3-197.5)   | 136.5 (90.3-197.8)   | 127.0 (90.3-197.5)   | 0.86    | 128.0 (90.3-192.0)   | 169.0 (90.3-240.3)   | 0.25    |
| <b>HDL (mg/dL)</b>    | 43.0 (36.0-49.0)     | 41.5 (34.0-48.8)     | 43.5 (39.3-50.8)     | 0.08    | 43.0 (36.0-49.0)     | 42.5 (30.3-47.8)     | 0.31    |
| <b>LDL (mg/dL)</b>    | 99.5 (79.8-123.0)    | 96.5 (79.5-122.3)    | 103.0 [79.75-127.5]  | 0.490   | 99.0 [79-123]        | 112.0 (86.0-127.0)   | 0.646   |

All values reported as median(IQR)
